# Supplementary material for: SPX family response to low phosphorus stress and the involvement of ZmSPX1 in phosphorus homeostasis in maize
Source: Front Plant Sci. 2024 Jul 8;15:1385977. doi: 10.3389/fpls.2024.1385977 (PMC11260721; doi:10.3389/fpls.2024.1385977)
Supplement: Supplementary file 2 [file Table_1.xlsx]

## Sheet: Table S1
Table S1 Primers utilized for the detection of maize transgenic lines
Transgenic type	Farward and reverse primers
overexpression	CCATCGTCAACCACTACATCGAGACA
	CTTCAGCAGGTGGGTGTAGAGCGT
knockout	CCCCTCCGCGAATCTCATTT
	TGAAAGCAACACATGCGACG

## Sheet: Table S2
Table S2 Prediction of active region of ZmSPXs promoter
Name of Gene	Active stating position	Active final position	Score
ZmSPX1	424	474	0.99
	1931	1981	0.83
ZmSPX2	211	261	1
	1288	1338	1
ZmSPX3	736	786	0.94
	768	818	0.89
	1414	1464	0.81
	1447	1497	0.87
	1547	1597	1
	1698	1748	0.83
ZmSPX4	610	660	0.99
	1167	1217	0.82
ZmSPX5	1134	1184	0.92
	1947	1997	0.96
ZmSPX6	135	185	0.93
	573	623	0.91
	786	836	0.82
	850	900	1
	1377	1427	0.98
	1464	1514	0.86
	1553	1603	0.94
	1881	1931	0.84

## Sheet: Table S3
Table S3 Primers used for full-length CDS sequence cloning of ZmSPXs
Name of Gene	Farward and reverse primers 5'-3'
ZmSPX1	TCATCATTATGGTTTACCGTGTTGC
	CATTATCACAATCAGAAGCCACACC
ZmSPX2	GCCTAAACACGATTACACGACT
	AAACACTACCTACAGCAACAGC
ZmSPX3	ATGAAGTTTGGCAAGAGGCTCAAG
	TCAGATGGACACTTGACCGGC
ZmSPX4	ATAAGAAGGCAGGAGCGACGAA
	CAAACTTCTGGCAACTGGCATG
ZmSPX5	ATTAAGCTGCCCGTCGCTAATG
	CAGCCGCATACAGAGCACCACT
ZmSPX6	GGGTGACCATCATCATCAGTAA
	GGAACCAAATTGAGTATGAGCT

## Sheet: Table S4
Table S4 Primers used for qRT-PCR of ZmSPXs
Name of Gene	Farward and reverse primers 5'-3'	Amplification efficiency
ZmSPX1	TCTCGTTGCCACCTCTTCA	1.936
	CGCCTGCTCTATCACTGTTAC
ZmSPX2	ATCCGCCTGCCCTTCATC	1.936
	GTCGCCGTCGCTGTCT
ZmSPX3	AGGACTTCGTCATACGGCACA	1.931
	AGCAGCAGCACCATCTCCC
ZmSPX4	CCTCCGTGTGATGAAGTT	2.041
	GCACCAGGTTCTTGATGA
ZmSPX5	TTCAGCCTCCTCTTATTCTC	1.93
	TTCATCGGTCAGTAATGTCT
ZmSPX6	GCAGCATCAACTACATAGG	1.953
	ATCAAGGACTCGCACTC
GAPDH	ACTTCGGCATTGTTGAGG	1.949
	AAGTCGGTAGAAACCAGAT

## Sheet: Table S5
Table S5 Homologous recombinant primers used for expression vector
Name of Gene	Farward and reverse primers
ZmSPX1	ATGCTGGAGCAGCTCCTTCC
	TTTGGCCGCCTGCTCTATC
ZmSPX2	ATGAAGTTCGGCAAGAGCCTC
	CCGTAGTGGCGGCAGGGA
ZmSPX3	ATGAAGTTTGGCAAGAGGCTCAAG
	TCAGATGGACACTTGACCGGC
ZmSPX4	ATGAAGTTCGGGAAGGATTTCC
	TTCATCAGTCGGCTCGCCT
ZmSPX5	ATTAAGCTGCCCGTCGCTAATG
	CAGCCGCATACAGAGCACCACT
ZmSPX6	ATGGTGCAGTTCGGCAAGTG
	TCGGGTCGGGATCGGAAA

## Sheet: Table S6
Table S6 Primers used for yeast two-hybrid expression vector
Name of Gene	Farward and reverse primers
ZmSPX1	ATGCTGGAGCAGCTCCTTCC
	TCATTTGGCCGCCTGCTC
ZmSPX2	ATGAAGTTCGGCAAGAGCCTC
	TCACCGTAGTGGCGGCAG
ZmSPX3	ATGAAGTTTGGCAAGAGGCTCAAG
	TCAGATGGACACTTGACCGGC
ZmSPX4	AACATATGATGAAGTTCGGGAAGGATTTC
	AAGAATTCTTATTCATCAGTCGGCTCG
ZmSPX5	ATTAAGCTGCCCGTCGCTAATG
	CAGCCGCATACAGAGCACCACT
ZmSPX6	AACATATGATGGTGCAGTTCGGCAAG
	AAGAATTCTCATCGGGTCGGGATCG
ZmPHR1	ATGAGGAAGTTTAATCTGATGCAGTC
	TTAACTATCTTGCAGTTTGCGCC
ZmPHR2	ATGGAGAGGTTAAGCACCAACC
	TTATTTTGTTTGCTTGGTTGATCC

## Sheet: Table S7
Table S7 Transcriptomic response of the SPXs gene family to low-Pi conditions
Reserch	GeneID (V3)	GeneID (V4)	Name	CK_178leaf_FPKM	T_178leaf_FPKM	log2(foldchange)	Pvalue	CK_178root_FPKM	T_178root_FPKM	log2(foldchange)	Pvalue
Nie et al., 2021	GRMZM2G024705	Zm00001d033047	ZmSPX3	0.263076	11.639	5.46735	0.185791	0.163455	94.083	9.1689	0.0122651
	GRMZM2G035579	Zm00001d046500	ZmSPX1	7.7318	138.734	4.16537	0.0342267	7.39889	277.033	5.2266	0.0193327
	GRMZM2G065989	Zm00001d044541	ZmSPX6	0.574726	80.526	7.13044	0.0176177	1.0638	290.848	8.0949	0.00423071
	GRMZM2G083655	Zm00001d046500	ZmSPX7	19.0275	23.6645	0.314638	0.680249	14.385	25.2156	0.809751	0.21759
	GRMZM2G122108	Zm00001d034718	ZmSPX4	3.96476	60.2987	3.92682	0.0207333	2.43203	53.8132	4.46772	0.0780444
	GRMZM2G171423	Zm00001d053626	ZmSPX2	10.4421	98.9081	3.24367	0.00547947	5.20735	57.2424	3.45846	0.115735
	GRMZM5G828488	Zm00001d029460	ZmSPX5	0.001	14.7436	13.8478	0.000109102	0.113627	119.797	10.0421	0.020443
Luo et al., 2023	--	Zm00001d033047	ZmSPX3	--	--	--	--	0.483581	33.18	6.10041	5e-05
	--	Zm00001d046500	ZmSPX1	--	--	--	--	3.8928	60.5091	3.95827	5e-05
	--	Zm00001d044541	ZmSPX6	--	--	--	--	0.2319	79.4745	8.42084	5e-05
	--	Zm00001d034718	ZmSPX4	--	--	--	--	11.4179	14.8102	0.375295	0.0238
	--	Zm00001d053626	ZmSPX2	--	--	--	--	0.351661	4.9683	3.8205	5e-05
	--	Zm00001d029460	ZmSPX5	--	--	--	--	1.4938e-05	1.1104	16.1817	0.2164
Reference
Nie, Z., Luo, B., Zhang, X., Wu, L., Liu, D., Guo, J., ... & Gao, S. (2021). Combined transcriptome and proteome analysis of maize (Zea mays l.) reveals a complementary profile in response to phosphate deficiency. Current Issues in Molecular Biology, 43(2), 1142-1155.
Luo, B., Zhang, Z., Li, B., Zhang, H., Ma, J., Li, J., ... & Gao, S. (2023). Chromatin remodeling analysis reveals the RdDM pathway responds to low‐phosphorus stress in maize. The Plant Journal.

## Sheet: Table S8
Table S8 SPX domain-containing proteins in other plants
Gene Name	Gene ID	Reference
AtSPX1	At5g20150	Secco et al., 2012
AtSPX2	At2g26660
AtSPX3	At2g45130
AtSPX4	At5g15330
OsSPX1	Os06g40120	Secco et al., 2012
OsSPX2	Os02g10780
OsSPX3	Os10g25310
OsSPX4	Os03g61200
OsSPX5	Os03g29250
OsSPX6	Os07g42330
GmSPX1	Glyma01g33170	Yao et al., 2014
GmSPX2	Glyma04g07160
GmSPX3	Glyma04g19450
GmSPX4	Glyma06g07260
GmSPX5	Glyma10g40820
GmSPX6	Glyma13g05570
GmSPX7	Glyma13g23580
GmSPX8	Glyma17g12340
GmSPX9	Glyma20g26490
BnaA2.SPX1	BnaA02g04730D	Du et al., 2017
BnaA3.SPX1	BnaA03g07930D
BnaC3.SPX1	BnaC03g10000D
BnaA3.SPX2	BnaA03g22680D
BnaC3.SPX2	BnaC03g26700D
BnaA3.SPX3	BnaA03g21050D
BnaA4.SPX3	BnaA04g26060D
BnaC3.SPX3	BnaC03g25110D
BnaC4.SPX3	BnaC04g50120D
BnaA10.SPX4	BnaA10g18780D
BnaC9.SPX4	BnaC09g42510D
TaSPX2-2A	TraesCS2A02G169600	Kumar et al., 2019
TaSPX5-2B	TraesCS2B02G195900
TaSPX8-2D	TraesCS2D02G177100
TaSPX10-4A	TraesCS4A02G367200
TaSPX15-5B	TraesCS5B02G505400
TaSPX18-5D	TraesCS5D02G506200
TaSPX33-7A	TraesCS7A02G376200
TaSPX35-7A	TraesCS7A02G554000
TaSPX36-7A	TraesCS7A02G554100
TaSPX37-7A	TraesCS7A02G554800
TaSPX39-7B	TraesCS7B02G277700
TaSPX40-7B	TraesCS7B02G478000
TaSPX43-7D	TraesCS7D02G372600
TaSPX45-7D	TraesCS7D02G541100
TaSPX46-7D	TraesCS7D02G541600
Reference
Du, H., Yang, C., Ding, G., Shi, L., & Xu, F. (2017). Genome-wide identification and characterization of SPX domain-containing members and their responses to phosphate deficiency in Brassica napus. Frontiers in plant science, 8, 35.
Kumar, A., Sharma, M., Gahlaut, V., Nagaraju, M., Chaudhary, S., Kumar, A., ... & Singh, K. P. (2019). Genome-wide identification, characterization, and expression profiling of SPX gene family in wheat. International journal of biological macromolecules, 140, 17-32.
Secco, D., Wang, C., Arpat, B. A., Wang, Z., Poirier, Y., Tyerman, S. D., ... & Whelan, J. (2012). The emerging importance of the SPX domain‐containing proteins in phosphate homeostasis. New Phytologist, 193(4), 842-851.
Yao, Z., Tian, J., & Liao, H. (2014). Comparative characterization of GmSPX members reveals that GmSPX3 is involved in phosphate homeostasis in soybean. Annals of botany, 114(3), 477-488.

## Sheet: Table S9
Table S9 Summary of cis-acting elements of the ZmSPXs promoter from maize
Name of genes	Homeotropic cis-elements	Function
ZmSPXs（ZmSPX1, ZmSPX2，ZmSPX3, ZmSPX4，ZmSPX5, ZmSPX6）Common cis-acting element	ARE	Cis-acting regulatory elements necessary for anaerobic induction
	CAAT-box	Common cis-acting elements in promoter and enhancer regions
	MYB	Function unknown
	MYC	Function unknown
	MYB	Function unknown
	STRE	Function unknown
	TATA-box	core promoter transcription initiation
	Unnamed__4	Function unknown
ZmSPX1, ZmSPX2，ZmSPX6 Common cis-acting element	ABRE	Cis-acting elements involved in the abscisic acid responsiveness
	G-box	Cis-acting regulatory elements in photosynthesis
ZmSPX1,ZmSPX4，ZmSPX6 Common cis -acting element	AT~TATA-box	Function unknown
	GATA-motif	Part of the photoresponsive element
	TCT-motif	Part of the photoresponsive element
ZmSPX2, ZmSPX4，ZmSPX6 Common cis-acting element	Box 4	Part of a conserved DNA module involved in the photoreaction
	CGTCA-motif	Cis-regulatory factors involved in methyl jasmonate reaction
	TGACG-motif	Cis-acting regulatory elements necessary for anaerobic induction
	as-1	Function unknown
	WUN-motif	Function unknown
ZmSPX1, ZmSPX4 Common cis-acting element	AAGAA-motif	Function unknown
	MYB-like sequence	Function unknown
ZmSPX1,ZmSPX6 Common cis -acting element	ATC-motif	Part of a conserved DNA module involved in the photoreaction
	LTR	Cis-acting elements involving low-temperature response
	TGA-element	Auxin response element
ZmSPX2,ZmSPX4 Common cis-acting element	GA-motif	Part of the photo responsive element
	MBS	MYB binding sites involved in drought induction
	W box	Function unknown
ZmSPX2,ZmSPX3, ZmSPX6 Common cis-acting element	MRE	MYB binding sites participate in the photoreaction
	O2-site	Cis-acting regulators involved in the regulation of zein metabolism
	TATA	Function unknown
	Unnamed__2	Function unknown
	WRE3	Function unknown
ZmSPX1,ZmSPX2 Common cis-acting element	Myc	Function unknown
		Part of the photo responsive element
ZmSPX4,ZmSPX6 Common cis-acting element	TCCC-motif	Function unknown
ZmSPX1 Special cis-acting element	ABRE3a	Function unknown
	ABRE4	Function unknown
	Box III	Protein binding sites
	DRE core	Function unknown
	GARE-motif	Gibberellin reaction element
	MYB-binding site	Function unknown
	Myc	Function unknown
	TCA	Function unknown
	TCA-element	Cis-acting elements involved in a salicylic acid reaction
ZmSPX2 Special cis-acting element	ACE	Cis-acting elements in photoreaction
	AE-box	Part of the light response module
	CAT-box	Cis-acting regulatory elements are related to meristem expression
	CCAAT-box	Mybhv1 binding site
	MYB recognition site	Function unknown
	P-box	Gibberellin reaction element
	Sp1	Photo responsive element
	TC-rich repeats	CIS operational elements involved in the defense and stress response
	Unnamed__1	Function unknown
	Unnamed__16	Function unknown
ZmSPX3 Special cis-acting element	G-box	Cis-acting regulating element involved in light responsive
ZmSPX4 Special cis-acting element	ATCT-motif	Part of a conserved DNA module involved in photoreaction
	ERE	Function unknown
	S-box	Function unknown
ZmSPX6 Special cis-acting element	A-box	Cis-acting regulating element
	AT-rich element	At DNA rich binding protein (atbp-1) binding site
	CCGTCC motif	Function unknown
	CCGTCC-box	Function unknown
	E2Fb	Function unknown
	GC-motif	Enhancer like elements involved in hypoxia specific induction
	GT1-motif	Photo responsive element
	GTGGC-motif	Part of the photo responsive element
	I-box	Part of the photo responsive element
	MBSI	MYB binding sites involved in the regulation of flavonoid biosynthesis genes
	Unnamed__6	MYB binding sites involved in the regulation of flavonoid biosynthesis genes

## Sheet: Table S10
Table S10 Summary of parameters for the analysis of nucleotide polymorphisms of ZmSPX1 in GWAS population
Parameters	Upstream	CDS	Downstream	Full length
Total length of amplicons (bp)	780	354	256	1390
Number of all the sequence variants	30	2	9	41
Frequency of all of the sequence variants	0.038	0.006	0.035	0.029
Number of polymorphic sites	26	2	6	34
Frequency of polymorphic sites per bp	0.033	0.006	0.023	0.024
Number of indels sites	10	0	8	18
Number of indels events	4	0	3	7
Average Indel length	2.5	0	2.667	2.571
Frequency of indels per bp	0.005	0	0.012	0.005
π×1000	0.013	0.002	0.006	0.009
θ×1000	0.007	0.002	0.008	0.006
Tajima's D	2.566*	-0.158	-0.665	1.513
Fu and Li's D	0.082	-1.716	-0.679	-0.59
Fu and Li's F	1.865*	-1.421	-0.808	0.756

[truncated: 4 more sheets: Table S11, Table S12, Table S13, Table S14]
